# Supplementary material for: Combination treatment for myeloproliferative neoplasms using JAK and pan-class I PI3K inhibitors
Source: PubMed Central journal article supplement (PMC4117552; doi:10.1111/jcmm.12156), 2013-11-19
Supplement: jcmm0017-1397-sd1.pdf [file jcmm0017-1397-sd1.pdf]

**Supplemental Figure 1.** Protocols for *in vivo* tumor model of Ba/F3 TpoR JAK2 V617F cells in nude mice.

A. Supplementary Protocol 1: Progression of leukemia in mice inoculated with Ba/F3 TpoR JAK2 V617F GFP cells.

| <b>Groups</b> | <b>N</b> | <b>Inoculation</b>              |
|---------------|----------|---------------------------------|
| Day 8 - c     | 5        | Ba/F3 TpoR JAK2 V617F GFP cells |
| Day 8 - m     | 3        | Medium                          |
| Day 8 - b     | 3        | -                               |
| Day 14 - c    | 5        | Ba/F3 TpoR JAK2 V617F GFP cells |
| Day 14 - m    | 3        | Medium                          |
| Day 14 - b    | 3        | -                               |

Mice in group Day 8 - c and group Day 14 - c (n = 5 per group) were inoculated with  $1 \times 10^7$  of Ba/F3 TpoR JAK2 V617F GFP cells via tail vein injection. Mice in group Day 8 - m and group Day 14 - m (n = 3 per group) were inoculated with 100  $\mu$ l of cell culture medium without any cells. Mice in group Day 8 - b and group Day 14 - b (n = 3 per group) received neither cells nor medium; they are called blank. Mice were euthanized on day 8 and day 14 using CO<sub>2</sub> gas. Spleen, liver and blood samples were collected. N is the number of mice per group.

B. Supplementary Protocol 2: Effect of JAK2 and PI3K inhibitions on mice spleen weight

| <b>Groups</b> | <b>N</b> | <b>Agent</b>          | <b>Dose (mg/kg)</b>                | <b>Route</b> | <b>Schedule</b> |
|---------------|----------|-----------------------|------------------------------------|--------------|-----------------|
| Day 16 - V    | 5        | Vehicle               | 200 $\mu$ l/20 g; 100 $\mu$ l/20 g | po           | bid             |
| Day 16 - 50G  | 5        | GDC0941               | 50                                 | po           | qd              |
| Day 16 - 50I  | 5        | Ruxolitinib           | 50; 50                             | po           | bid             |
| Day 16 - 50GI | 5        | GDC0941 + Ruxolitinib | 50+50; 50                          | po           | qd; bid         |

Ba/F3 TpoR JAK2 V617F GFP cells ( $1 \times 10^7$ ) were intravenously inoculated into 8 – 10 weeks old female nude mice. The inoculated mice were randomly organized into 5 per group (N). After 3 days, mice were treated with either vehicle, GDC0941 alone, ruxolitinib alone or the combination of GDC0941 and ruxolitinib. Mice in group Day 16 – V were orally administered twice a day (bid) with vehicle at 200  $\mu$ l/20 g in the morning and 100  $\mu$ l/20 g in the evening (8 hours difference from the morning dose). The vehicle comprised of a mixture of 0.5% methylcellulose and 0.1% Tween-80. Mice in group Day 16 – 50G were orally administered once a day (qd) with GDC0941 alone at 50 mg/kg. The volume of administration of GDC0941 was 200  $\mu$ l/20 g. Mice in group Day 16 – 50I were orally administered twice a day (bid) with ruxolitinib alone at 50 mg/kg body weight. Mice in group Day 16 - 50GI were orally administered twice a day (bid) with the combination of 50 mg/kg GDC0941 and ruxolitinib in the morning, and with ruxolitinib alone 50 mg/kg in the evening. The volume of drug administration for Day 16 – 50I group and Day 16 – 50GI group followed that of Day 16 – V group. After 12 days of treatment, mice were euthanized using CO<sub>2</sub> gas. Spleens were collected. qd: every day, bid: twice a day, po: per oral.

**Supplemental Figure 2.** Combination study with ruxolitinib and PI3K inhibitors. The combination indices for 3 effective doses (ED) are shown for Ruxolitinib with ZSTK474 (A), NVP-BEZ235 (B), GDC0941 (C) and TGX221 (D). ED50 represents effective dose resulting in 50% cell viability. Boxes shaded in grey have combination index values larger than 0.8.

A.

**TpoR JAK2 WT with IL3**

| Drug (Ratio)               | Combination Index at |      |      |
|----------------------------|----------------------|------|------|
|                            | ED50                 | ED75 | ED90 |
| ZSTK474/Ruxolitinib (1:8)  | 0.1                  | 0.1  | 0.2  |
| ZSTK474/Ruxolitinib (1:4)  | 0.1                  | 0.2  | 0.2  |
| ZSTK474/Ruxolitinib (1:2)  | 0.1                  | 0.2  | 0.2  |
| ZSTK474/Ruxolitinib (1:1)  | 0.2                  | 0.2  | 0.3  |
| ZSTK474/Ruxolitinib (2:1)  | 0.2                  | 0.2  | 0.2  |
| ZSTK474/Ruxolitinib (4:1)  | 0.3                  | 0.2  | 0.3  |
| ZSTK474/Ruxolitinib (8:1)  | 0.4                  | 0.3  | 0.3  |
| ZSTK474/Ruxolitinib (16:1) | 0.5                  | 0.4  | 0.3  |

**Bcr-abl**

| Drug (Ratio)               | Combination Index at |      |      |
|----------------------------|----------------------|------|------|
|                            | ED50                 | ED75 | ED90 |
| ZSTK474/Ruxolitinib (1:8)  | >10                  | >10  | >10  |
| ZSTK474/Ruxolitinib (1:4)  | >10                  | >10  | >10  |
| ZSTK474/Ruxolitinib (1:2)  | 1.6                  | >10  | >10  |
| ZSTK474/Ruxolitinib (1:1)  | 6.0                  | >10  | >10  |
| ZSTK474/Ruxolitinib (2:1)  | 3.2                  | >10  | >10  |
| ZSTK474/Ruxolitinib (4:1)  | 1.8                  | >10  | >10  |
| ZSTK474/Ruxolitinib (8:1)  | 3.3                  | >10  | >10  |
| ZSTK474/Ruxolitinib (16:1) | 4.3                  | >10  | >10  |

**TpoR JAK2 V617F**

| Drug (Ratio)               | Combination Index at |      |      |
|----------------------------|----------------------|------|------|
|                            | ED50                 | ED75 | ED90 |
| ZSTK474/Ruxolitinib (1:8)  | 0.0                  | 0.0  | 0.1  |
| ZSTK474/Ruxolitinib (1:4)  | 0.2                  | 0.1  | 0.1  |
| ZSTK474/Ruxolitinib (1:2)  | 0.1                  | 0.1  | 0.1  |
| ZSTK474/Ruxolitinib (1:1)  | 0.2                  | 0.1  | 0.1  |
| ZSTK474/Ruxolitinib (2:1)  | 0.2                  | 0.1  | 0.1  |
| ZSTK474/Ruxolitinib (4:1)  | 0.2                  | 0.1  | 0.1  |
| ZSTK474/Ruxolitinib (8:1)  | 0.2                  | 0.1  | 0.1  |
| ZSTK474/Ruxolitinib (16:1) | 0.3                  | 0.2  | 0.1  |

**JAK2 WT with IL3**

| Drug (Ratio)               | Combination Index at |      |      |
|----------------------------|----------------------|------|------|
|                            | ED50                 | ED75 | ED90 |
| ZSTK474/Ruxolitinib (1:8)  | 0.5                  | 0.4  | 0.3  |
| ZSTK474/Ruxolitinib (1:4)  | 0.3                  | 0.3  | 0.3  |
| ZSTK474/Ruxolitinib (1:2)  | 0.3                  | 0.3  | 0.2  |
| ZSTK474/Ruxolitinib (1:1)  | 0.2                  | 0.2  | 0.2  |
| ZSTK474/Ruxolitinib (2:1)  | 0.1                  | 0.1  | 0.2  |
| ZSTK474/Ruxolitinib (4:1)  | 0.2                  | 0.1  | 0.1  |
| ZSTK474/Ruxolitinib (8:1)  | 0.1                  | 0.1  | 0.2  |
| ZSTK474/Ruxolitinib (16:1) | 0.1                  | 0.1  | 0.1  |

**TpoR W515L**

| Drug (Ratio)               | Combination Index at |      |      |
|----------------------------|----------------------|------|------|
|                            | ED50                 | ED75 | ED90 |
| ZSTK474/Ruxolitinib (1:8)  | 0.2                  | 0.2  | 0.2  |
| ZSTK474/Ruxolitinib (1:4)  | 0.2                  | 0.2  | 0.2  |
| ZSTK474/Ruxolitinib (1:2)  | 0.3                  | 0.2  | 0.2  |
| ZSTK474/Ruxolitinib (1:1)  | 0.2                  | 0.2  | 0.2  |
| ZSTK474/Ruxolitinib (2:1)  | 0.3                  | 0.2  | 0.2  |
| ZSTK474/Ruxolitinib (4:1)  | 0.3                  | 0.3  | 0.2  |
| ZSTK474/Ruxolitinib (8:1)  | 0.3                  | 0.3  | 0.3  |
| ZSTK474/Ruxolitinib (16:1) | 0.4                  | 0.5  | 0.6  |

**JAK2 V617F**

| Drug (Ratio)               | Combination Index at |      |      |
|----------------------------|----------------------|------|------|
|                            | ED50                 | ED75 | ED90 |
| ZSTK474/Ruxolitinib (1:8)  | 0.1                  | 0.1  | 0.2  |
| ZSTK474/Ruxolitinib (1:4)  | 0.1                  | 0.1  | 0.0  |
| ZSTK474/Ruxolitinib (1:2)  | 0.1                  | 0.0  | 0.0  |
| ZSTK474/Ruxolitinib (1:1)  | 0.3                  | 0.1  | 0.0  |
| ZSTK474/Ruxolitinib (2:1)  | 0.3                  | 0.0  | 0.0  |
| ZSTK474/Ruxolitinib (4:1)  | 0.3                  | 0.0  | 0.0  |
| ZSTK474/Ruxolitinib (8:1)  | 0.1                  | 0.0  | 0.0  |
| ZSTK474/Ruxolitinib (16:1) | 0.2                  | 0.0  | 0.0  |

**B.**

**TpoR JAK2 WT with IL3**

| Drug (Ratio)               | Combination Index at |      |      |
|----------------------------|----------------------|------|------|
|                            | ED50                 | ED75 | ED90 |
| GDC0941/Ruxolitinib (1:8)  | 0.2                  | 0.3  | 0.4  |
| GDC0941/Ruxolitinib (1:4)  | 0.3                  | 0.6  | 1.1  |
| GDC0941/Ruxolitinib (1:2)  | 0.3                  | 0.3  | 0.4  |
| GDC0941/Ruxolitinib (1:1)  | 0.3                  | 0.3  | 0.3  |
| GDC0941/Ruxolitinib (2:1)  | 0.3                  | 0.3  | 0.3  |
| GDC0941/Ruxolitinib (4:1)  | 0.3                  | 0.2  | 0.2  |
| GDC0941/Ruxolitinib (8:1)  | 0.3                  | 0.2  | 0.2  |
| GDC0941/Ruxolitinib (16:1) | 0.4                  | 0.3  | 0.2  |

**Bcr-abl**

| Drug (Ratio)               | Combination Index at |      |      |
|----------------------------|----------------------|------|------|
|                            | ED50                 | ED75 | ED90 |
| GDC0941/Ruxolitinib (1:8)  | 4.3                  | >10  | >10  |
| GDC0941/Ruxolitinib (1:4)  | 2.9                  | >10  | >10  |
| GDC0941/Ruxolitinib (1:2)  | 8.8                  | >10  | >10  |
| GDC0941/Ruxolitinib (1:1)  | 1.8                  | 2.5  | 9.8  |
| GDC0941/Ruxolitinib (2:1)  | 1.8                  | 1.2  | 2.1  |
| GDC0941/Ruxolitinib (4:1)  | 1.9                  | 4.5  | >10  |
| GDC0941/Ruxolitinib (8:1)  | 1.6                  | 2.6  | 7.3  |
| GDC0941/Ruxolitinib (16:1) | 1.8                  | 3.6  | >10  |

**TpoR JAK2 V617F**

| Drug (Ratio)               | Combination Index at |      |      |
|----------------------------|----------------------|------|------|
|                            | ED50                 | ED75 | ED90 |
| GDC0941/Ruxolitinib (1:8)  | 0.3                  | 0.5  | 0.6  |
| GDC0941/Ruxolitinib (1:4)  | 0.2                  | 0.6  | 1.6  |
| GDC0941/Ruxolitinib (1:2)  | 0.4                  | 0.5  | 0.7  |
| GDC0941/Ruxolitinib (1:1)  | 0.5                  | 0.4  | 0.4  |
| GDC0941/Ruxolitinib (2:1)  | 0.6                  | 0.5  | 0.5  |
| GDC0941/Ruxolitinib (4:1)  | 0.4                  | 0.4  | 0.5  |
| GDC0941/Ruxolitinib (8:1)  | 0.4                  | 0.5  | 0.7  |
| GDC0941/Ruxolitinib (16:1) | 0.8                  | 0.6  | 0.5  |

**JAK2 WT with IL3**

| Drug (Ratio)               | Combination Index at |      |      |
|----------------------------|----------------------|------|------|
|                            | ED50                 | ED75 | ED90 |
| GDC0941/Ruxolitinib (1:8)  | 0.2                  | 0.2  | 0.2  |
| GDC0941/Ruxolitinib (1:4)  | 0.2                  | 0.2  | 0.3  |
| GDC0941/Ruxolitinib (1:2)  | 0.2                  | 0.2  | 0.3  |
| GDC0941/Ruxolitinib (1:1)  | 0.4                  | 0.3  | 0.2  |
| GDC0941/Ruxolitinib (2:1)  | 0.2                  | 0.2  | 0.2  |
| GDC0941/Ruxolitinib (4:1)  | 0.2                  | 0.2  | 0.3  |
| GDC0941/Ruxolitinib (8:1)  | 0.3                  | 0.4  | 0.4  |
| GDC0941/Ruxolitinib (16:1) | 0.3                  | 0.4  | 0.5  |

**TpoR W515L**

| Drug (Ratio)               | Combination Index at |      |      |
|----------------------------|----------------------|------|------|
|                            | ED50                 | ED75 | ED90 |
| GDC0941/Ruxolitinib (1:8)  | 0.4                  | 0.4  | 0.4  |
| GDC0941/Ruxolitinib (1:4)  | 0.4                  | 0.4  | 0.4  |
| GDC0941/Ruxolitinib (1:2)  | 0.4                  | 0.5  | 0.6  |
| GDC0941/Ruxolitinib (1:1)  | 0.6                  | 0.5  | 0.4  |
| GDC0941/Ruxolitinib (2:1)  | 0.5                  | 0.3  | 0.3  |
| GDC0941/Ruxolitinib (4:1)  | 0.3                  | 0.3  | 0.3  |
| GDC0941/Ruxolitinib (8:1)  | 0.4                  | 0.3  | 0.2  |
| GDC0941/Ruxolitinib (16:1) | 0.6                  | 0.3  | 0.2  |

**JAK2 V617F**

| Drug (Ratio)               | Combination Index at |      |      |
|----------------------------|----------------------|------|------|
|                            | ED50                 | ED75 | ED90 |
| GDC0941/Ruxolitinib (1:8)  | 0.1                  | 0.2  | 0.4  |
| GDC0941/Ruxolitinib (1:4)  | 0.1                  | 0.2  | 0.2  |
| GDC0941/Ruxolitinib (1:2)  | 0.2                  | 0.2  | 0.2  |
| GDC0941/Ruxolitinib (1:1)  | 0.3                  | 0.2  | 0.3  |
| GDC0941/Ruxolitinib (2:1)  | 0.4                  | 0.3  | 0.3  |
| GDC0941/Ruxolitinib (4:1)  | 0.5                  | 0.4  | 0.3  |
| GDC0941/Ruxolitinib (8:1)  | 0.4                  | 0.4  | 0.3  |
| GDC0941/Ruxolitinib (16:1) | 0.5                  | 0.4  | 0.4  |

C.

TpoR JAK2 WT with IL3

| Drug (Ratio)              | Combination Index at |      |      |
|---------------------------|----------------------|------|------|
|                           | ED50                 | ED75 | ED90 |
| BEZ235/Ruxolitinib (1:8)  | 0.7                  | 0.4  | 0.2  |
| BEZ235/Ruxolitinib (1:4)  | 0.8                  | 0.3  | 0.1  |
| BEZ235/Ruxolitinib (1:2)  | 0.6                  | 0.3  | 0.1  |
| BEZ235/Ruxolitinib (1:1)  | 0.6                  | 0.2  | 0.1  |
| BEZ235/Ruxolitinib (2:1)  | 0.5                  | 0.2  | 0.1  |
| BEZ235/Ruxolitinib (4:1)  | 0.4                  | 0.3  | 0.2  |
| BEZ235/Ruxolitinib (8:1)  | 0.3                  | 0.3  | 0.3  |
| BEZ235/Ruxolitinib (16:1) | 2.1                  | 9.4  | >10  |

Bcr-abl

Cells not responsive to treatment

TpoR JAK2 V617F

| Drug (Ratio)              | Combination Index at |      |      |
|---------------------------|----------------------|------|------|
|                           | ED50                 | ED75 | ED90 |
| BEZ235/Ruxolitinib (1:8)  | 0.3                  | 0.1  | 0.1  |
| BEZ235/Ruxolitinib (1:4)  | 0.2                  | 0.1  | 0.0  |
| BEZ235/Ruxolitinib (1:2)  | 0.2                  | 0.1  | 0.0  |
| BEZ235/Ruxolitinib (1:1)  | 0.2                  | 0.1  | 0.1  |
| BEZ235/Ruxolitinib (2:1)  | 0.2                  | 0.1  | 0.1  |
| BEZ235/Ruxolitinib (4:1)  | 0.2                  | 0.2  | 0.2  |
| BEZ235/Ruxolitinib (8:1)  | 0.2                  | 0.3  | 0.4  |
| BEZ235/Ruxolitinib (16:1) | 1.2                  | 0.8  | 0.6  |

JAK2 WT with IL3

| Drug (Ratio)              | Combination Index at |      |      |
|---------------------------|----------------------|------|------|
|                           | ED50                 | ED75 | ED90 |
| BEZ235/Ruxolitinib (1:8)  | 0.0                  | 0.0  | 0.0  |
| BEZ235/Ruxolitinib (1:4)  | 0.0                  | 0.0  | 0.0  |
| BEZ235/Ruxolitinib (1:2)  | 0.0                  | 0.0  | 0.0  |
| BEZ235/Ruxolitinib (1:1)  | 0.0                  | 0.0  | 0.0  |
| BEZ235/Ruxolitinib (2:1)  | 0.0                  | 0.0  | 0.0  |
| BEZ235/Ruxolitinib (4:1)  | 0.0                  | 0.0  | 0.0  |
| BEZ235/Ruxolitinib (8:1)  | 0.1                  | 0.1  | 0.3  |
| BEZ235/Ruxolitinib (16:1) | 0.2                  | 0.2  | 0.7  |

TpoR W515L

| Drug (Ratio)              | Combination Index at |      |      |
|---------------------------|----------------------|------|------|
|                           | ED50                 | ED75 | ED90 |
| BEZ235/Ruxolitinib (1:8)  | 0.0                  | 0.0  | 0.0  |
| BEZ235/Ruxolitinib (1:4)  | 0.1                  | 0.1  | 0.2  |
| BEZ235/Ruxolitinib (1:2)  | 0.3                  | 0.2  | 0.1  |
| BEZ235/Ruxolitinib (1:1)  | 0.4                  | 0.2  | 0.1  |
| BEZ235/Ruxolitinib (2:1)  | 1.3                  | 0.4  | 0.1  |
| BEZ235/Ruxolitinib (4:1)  | 3.0                  | 0.7  | 0.2  |
| BEZ235/Ruxolitinib (8:1)  | 2.0                  | 0.6  | 0.2  |
| BEZ235/Ruxolitinib (16:1) | 2.2                  | 0.9  | 0.4  |

JAK2 V617F

| Drug (Ratio)              | Combination Index at |      |      |
|---------------------------|----------------------|------|------|
|                           | ED50                 | ED75 | ED90 |
| BEZ235/Ruxolitinib (1:8)  | 0.0                  | 0.0  | 0.1  |
| BEZ235/Ruxolitinib (1:4)  | 0.0                  | 0.1  | 0.1  |
| BEZ235/Ruxolitinib (1:2)  | 0.1                  | 0.0  | 0.1  |
| BEZ235/Ruxolitinib (1:1)  | 0.1                  | 0.0  | 0.0  |
| BEZ235/Ruxolitinib (2:1)  | 0.2                  | 0.0  | 0.1  |
| BEZ235/Ruxolitinib (4:1)  | 0.2                  | 0.1  | 0.2  |
| BEZ235/Ruxolitinib (8:1)  | 0.2                  | 0.1  | 0.3  |
| BEZ235/Ruxolitinib (16:1) | 0.3                  | 0.1  | 0.5  |

D.

TpoR JAK2 WT with IL3

| Drug (Ratio)              | Combination index at |      |      |
|---------------------------|----------------------|------|------|
|                           | ED50                 | ED75 | ED90 |
| TGX221/Ruxolitinib (1:8)  | 0.8                  | 0.7  | 0.5  |
| TGX221/Ruxolitinib (1:4)  | 0.9                  | 0.6  | 0.4  |
| TGX221/Ruxolitinib (1:2)  | 0.7                  | 0.4  | 0.2  |
| TGX221/Ruxolitinib (1:1)  | 0.6                  | 0.3  | 0.1  |
| TGX221/Ruxolitinib (2:1)  | 0.6                  | 0.2  | 0.1  |
| TGX221/Ruxolitinib (4:1)  | 0.5                  | 0.2  | 0.1  |
| TGX221/Ruxolitinib (8:1)  | 0.5                  | 0.2  | 0.1  |
| TGX221/Ruxolitinib (16:1) | 0.7                  | 0.2  | 0.1  |

Bcr-abl

| Drug (Ratio)              | Combination Index at |      |      |
|---------------------------|----------------------|------|------|
|                           | ED50                 | ED75 | ED90 |
| TGX221/Ruxolitinib (1:8)  | 0.6                  | 0.2  | 0.1  |
| TGX221/Ruxolitinib (1:4)  | 0.4                  | 0.1  | 0.0  |
| TGX221/Ruxolitinib (1:2)  | 0.4                  | 0.1  | 0.0  |
| TGX221/Ruxolitinib (1:1)  | 0.8                  | 0.3  | 0.2  |
| TGX221/Ruxolitinib (2:1)  | 0.8                  | 0.2  | 0.1  |
| TGX221/Ruxolitinib (4:1)  | 1.2                  | 0.5  | 0.3  |
| TGX221/Ruxolitinib (8:1)  | 0.6                  | 0.1  | 0.0  |
| TGX221/Ruxolitinib (16:1) | 2.7                  | 4.3  | 7.3  |

TpoR JAK2 V617F

| Drug (Ratio)              | Combination index at |      |      |
|---------------------------|----------------------|------|------|
|                           | ED50                 | ED75 | ED90 |
| TGX221/Ruxolitinib (1:8)  | 0.4                  | 0.5  | 0.9  |
| TGX221/Ruxolitinib (1:4)  | 0.6                  | 0.5  | 0.5  |
| TGX221/Ruxolitinib (1:2)  | 0.8                  | 0.4  | 0.3  |
| TGX221/Ruxolitinib (1:1)  | 0.9                  | 0.7  | 0.6  |
| TGX221/Ruxolitinib (2:1)  | 0.8                  | 0.5  | 0.5  |
| TGX221/Ruxolitinib (4:1)  | 0.8                  | 0.9  | 1.2  |
| TGX221/Ruxolitinib (8:1)  | 0.8                  | 0.7  | 0.6  |
| TGX221/Ruxolitinib (16:1) | 1.0                  | 1.0  | 1.1  |

JAK2 WT with IL3

| Drug (Ratio)              | Combination index at |      |      |
|---------------------------|----------------------|------|------|
|                           | ED50                 | ED75 | ED90 |
| TGX221/Ruxolitinib (1:8)  | 0.6                  | 0.5  | 0.5  |
| TGX221/Ruxolitinib (1:4)  | 0.7                  | 0.6  | 0.5  |
| TGX221/Ruxolitinib (1:2)  | 0.8                  | 0.5  | 0.3  |
| TGX221/Ruxolitinib (1:1)  | 0.8                  | 0.4  | 0.2  |
| TGX221/Ruxolitinib (2:1)  | 0.6                  | 0.3  | 0.2  |
| TGX221/Ruxolitinib (4:1)  | 0.5                  | 0.3  | 0.2  |
| TGX221/Ruxolitinib (8:1)  | 0.3                  | 0.3  | 0.2  |
| TGX221/Ruxolitinib (16:1) | 0.7                  | 0.4  | 0.2  |

TpoR W515L

| Drug (Ratio)              | Combination index at |      |      |
|---------------------------|----------------------|------|------|
|                           | ED50                 | ED75 | ED90 |
| TGX221/Ruxolitinib (1:8)  | 0.4                  | 0.7  | 1.1  |
| TGX221/Ruxolitinib (1:4)  | 1.1                  | 1.0  | 0.9  |
| TGX221/Ruxolitinib (1:2)  | 1.2                  | 0.8  | 0.6  |
| TGX221/Ruxolitinib (1:1)  | 1.2                  | 0.7  | 0.4  |
| TGX221/Ruxolitinib (2:1)  | 0.9                  | 0.5  | 0.3  |
| TGX221/Ruxolitinib (4:1)  | 1.0                  | 0.5  | 0.3  |
| TGX221/Ruxolitinib (8:1)  | 0.7                  | 0.4  | 0.2  |
| TGX221/Ruxolitinib (16:1) | 0.7                  | 0.4  | 0.2  |

JAK2 V617F

| Drug (Ratio)              | Combination index at |      |      |
|---------------------------|----------------------|------|------|
|                           | ED50                 | ED75 | ED90 |
| TGX221/Ruxolitinib (1:8)  | 0.6                  | 0.6  | 0.6  |
| TGX221/Ruxolitinib (1:4)  | 0.7                  | 0.6  | 0.6  |
| TGX221/Ruxolitinib (1:2)  | 0.7                  | 0.5  | 0.4  |
| TGX221/Ruxolitinib (1:1)  | 0.9                  | 0.6  | 0.4  |
| TGX221/Ruxolitinib (2:1)  | 0.8                  | 0.6  | 0.5  |
| TGX221/Ruxolitinib (4:1)  | 0.7                  | 0.6  | 0.5  |
| TGX221/Ruxolitinib (8:1)  | 0.5                  | 0.5  | 0.5  |
| TGX221/Ruxolitinib (16:1) | 1.0                  | 0.8  | 0.6  |

**Supplemental Figure 3.** Combination study with ruxolitinib and Ku0063794 (mTOR inhibitor). Boxes shaded in grey have combination index values larger than 0.8. ED50 represents effective dose resulting in 50% cell viability.

**TpoR JAK2 WT with IL3**

| Drug (Ratio)                 | Combination index at |      |      |
|------------------------------|----------------------|------|------|
|                              | ED50                 | ED75 | ED90 |
| Ku0063794/Ruxolitinib (1:8)  | 0.6                  | 0.9  | 1.2  |
| Ku0063794/Ruxolitinib (1:4)  | 0.7                  | 1.2  | 2.2  |
| Ku0063794/Ruxolitinib (1:2)  | 0.7                  | 0.9  | 1.3  |
| Ku0063794/Ruxolitinib (1:1)  | 0.7                  | 0.6  | 0.7  |
| Ku0063794/Ruxolitinib (2:1)  | 0.7                  | 0.5  | 0.6  |
| Ku0063794/Ruxolitinib (4:1)  | 0.9                  | 0.6  | 0.8  |
| Ku0063794/Ruxolitinib (8:1)  | 1.4                  | 0.9  | 1.1  |
| Ku0063794/Ruxolitinib (16:1) | 3.3                  | 6.6  | >10  |

Bcr-abl

Unable to generate dose response curves

**TpoR JAK2 V617F**

| Drug (Ratio)                 | Combination index at |      |      |
|------------------------------|----------------------|------|------|
|                              | ED50                 | ED75 | ED90 |
| Ku0063794/Ruxolitinib (1:8)  | 0.2                  | 1.1  | 5.3  |
| Ku0063794/Ruxolitinib (1:4)  | 0.5                  | 1.2  | 2.9  |
| Ku0063794/Ruxolitinib (1:2)  | 0.8                  | 1.0  | 1.4  |
| Ku0063794/Ruxolitinib (1:1)  | 0.6                  | 0.5  | 0.7  |
| Ku0063794/Ruxolitinib (2:1)  | 1.0                  | 0.5  | 0.4  |
| Ku0063794/Ruxolitinib (4:1)  | 1.2                  | 0.5  | 0.4  |
| Ku0063794/Ruxolitinib (8:1)  | 1.9                  | 0.5  | 0.2  |
| Ku0063794/Ruxolitinib (16:1) | 2.6                  | 0.7  | 0.3  |

**JAK2 WT with IL3**

| Drug (Ratio)                 | Combination index at |      |      |
|------------------------------|----------------------|------|------|
|                              | ED50                 | ED75 | ED90 |
| Ku0063794/Ruxolitinib (1:8)  | 0.6                  | 1.3  | 2.9  |
| Ku0063794/Ruxolitinib (1:4)  | 0.4                  | 1.2  | 3.0  |
| Ku0063794/Ruxolitinib (1:2)  | 0.7                  | 0.8  | 1.0  |
| Ku0063794/Ruxolitinib (1:1)  | 0.5                  | 0.7  | 1.0  |
| Ku0063794/Ruxolitinib (2:1)  | 0.4                  | 0.6  | 1.0  |
| Ku0063794/Ruxolitinib (4:1)  | 0.3                  | 0.5  | 0.9  |
| Ku0063794/Ruxolitinib (8:1)  | 0.4                  | 0.7  | 1.7  |
| Ku0063794/Ruxolitinib (16:1) | 0.8                  | >10  | >10  |

**TpoR W515L**

| Drug (Ratio)                 | Combination index at |      |      |
|------------------------------|----------------------|------|------|
|                              | ED50                 | ED75 | ED90 |
| Ku0063794/Ruxolitinib (1:8)  | 0.5                  | 0.8  | 1.4  |
| Ku0063794/Ruxolitinib (1:4)  | 0.5                  | 1.0  | 2.0  |
| Ku0063794/Ruxolitinib (1:2)  | 1.0                  | 1.1  | 1.4  |
| Ku0063794/Ruxolitinib (1:1)  | 1.9                  | 1.2  | 0.9  |
| Ku0063794/Ruxolitinib (2:1)  | 2.1                  | 1.0  | 0.6  |
| Ku0063794/Ruxolitinib (4:1)  | 1.8                  | 0.9  | 0.6  |
| Ku0063794/Ruxolitinib (8:1)  | 2.7                  | 1.2  | 0.7  |
| Ku0063794/Ruxolitinib (16:1) | 3.9                  | 1.4  | 0.6  |

**JAK2 V617F**

| Drug (Ratio)                 | Combination index at |      |      |
|------------------------------|----------------------|------|------|
|                              | ED50                 | ED75 | ED90 |
| Ku0063794/Ruxolitinib (1:8)  | 0.1                  | 0.2  | 0.2  |
| Ku0063794/Ruxolitinib (1:4)  | 0.1                  | 0.1  | 0.2  |
| Ku0063794/Ruxolitinib (1:2)  | 0.2                  | 0.2  | 0.1  |
| Ku0063794/Ruxolitinib (1:1)  | 0.3                  | 0.2  | 0.1  |
| Ku0063794/Ruxolitinib (2:1)  | 0.4                  | 0.2  | 0.1  |
| Ku0063794/Ruxolitinib (4:1)  | 0.3                  | 0.1  | 0.1  |
| Ku0063794/Ruxolitinib (8:1)  | 0.4                  | 0.2  | 0.1  |
| Ku0063794/Ruxolitinib (16:1) | 0.5                  | 0.2  | 0.1  |

**Supplemental Figure 4.** Effects of JAK and PI3K inhibitors on signaling via the JAK2, STAT3/STAT5, PI3K, mTOR and MAPK/ERK1/2 in the Ba/F3 JAK2 WT and BaF3 JAK2 V617F (A), Ba/F3 TpoR wt and TpoR-W515L (B) or Ba/F3 Bcr-Abl (C) cell lines. The cells were treated with 1  $\mu$ M INCB018424 or 10  $\mu$ M NVP-BEZ235 or a combination of both kinase inhibitors. Western blotting was performed with the phospho-specific antibodies (phospho-JAK2 (Tyr1007/1008), phospho-STAT3 (Tyr705), phospho-STAT5 (Tyr694), phospho-p70 S6 kinase (Thr389), phospho-S6 ribosomal protein (Ser235/236), phospho-AKT (Ser473), phospho-p38 MAP kinase (Thr180/Tyr182), phospho-p44/42 ERK1/2 (Thr202/Tyr204), with antibodies to actin (as loading control) and with antibodies detecting the signaling proteins themselves.

A.

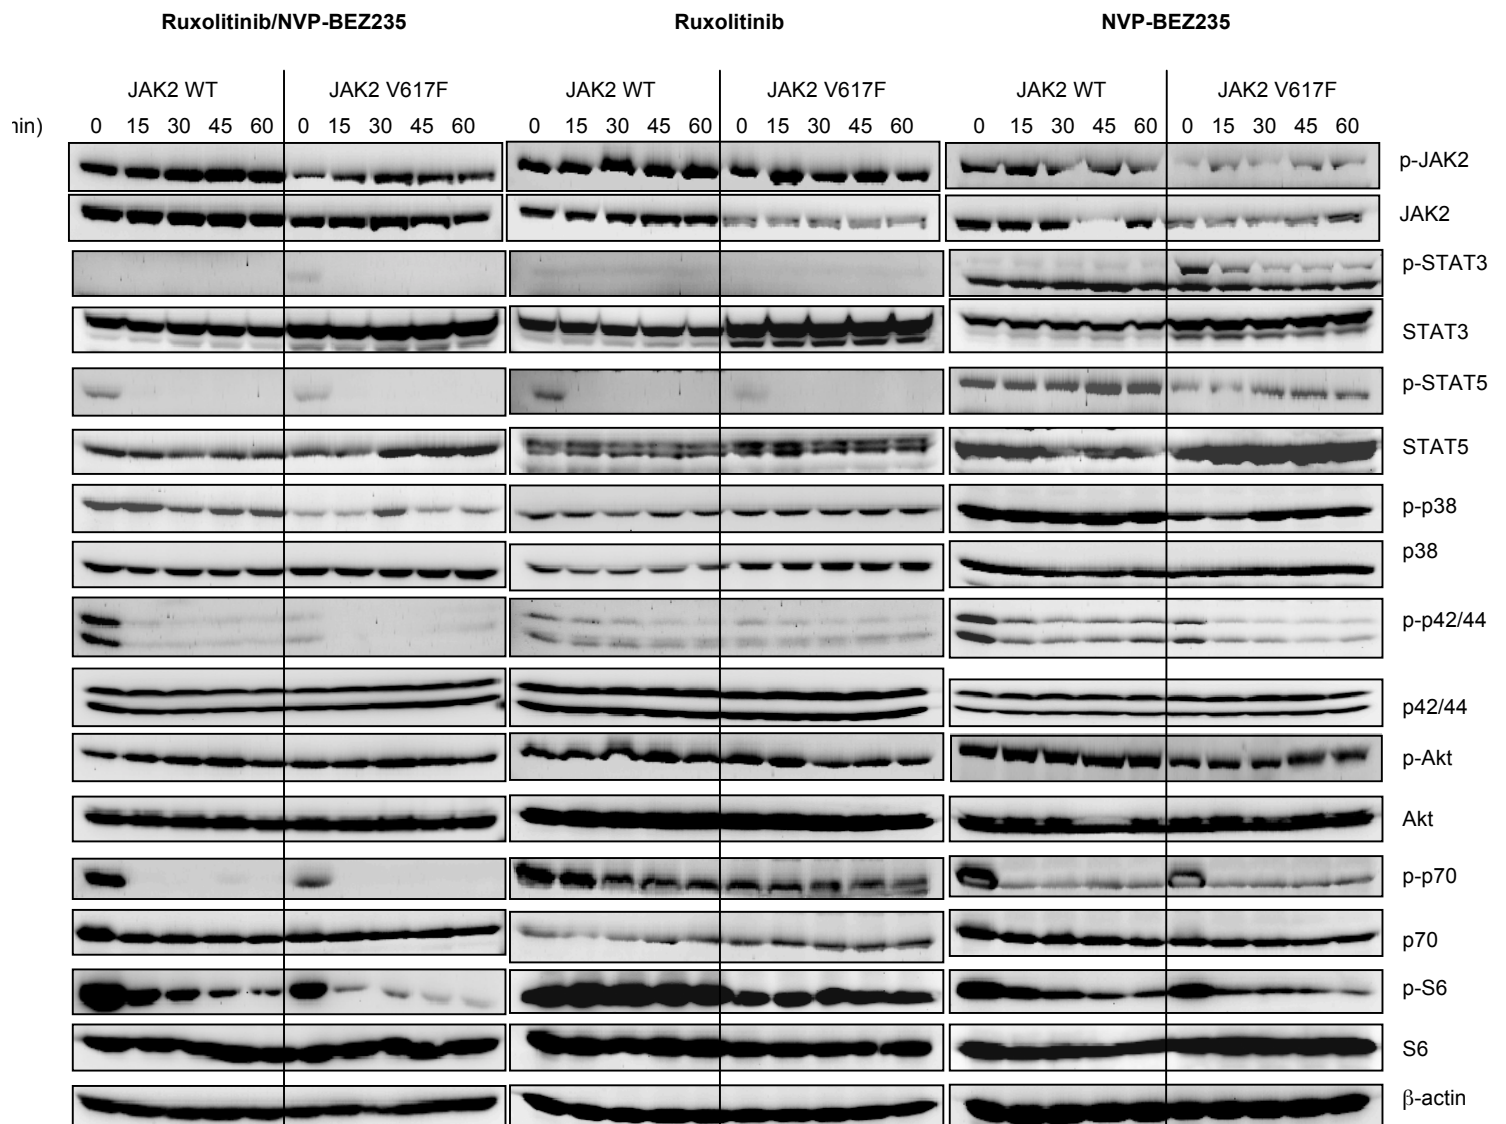



B.

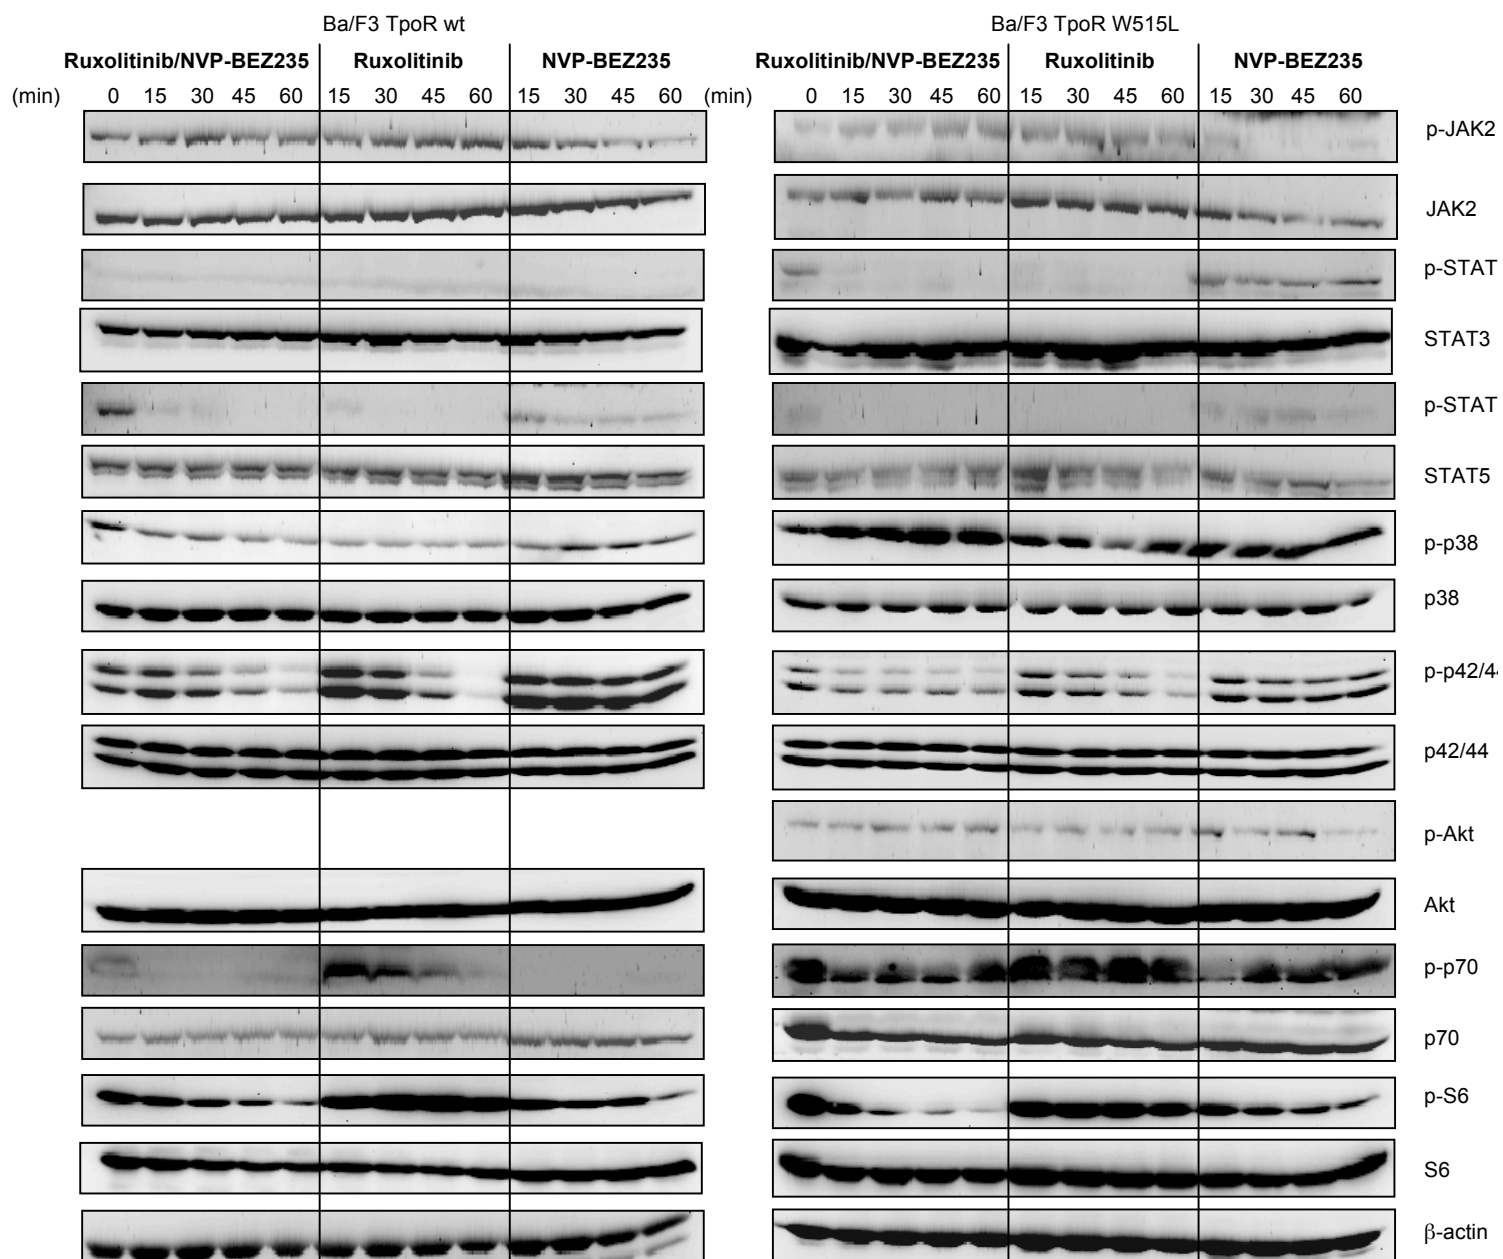

C.

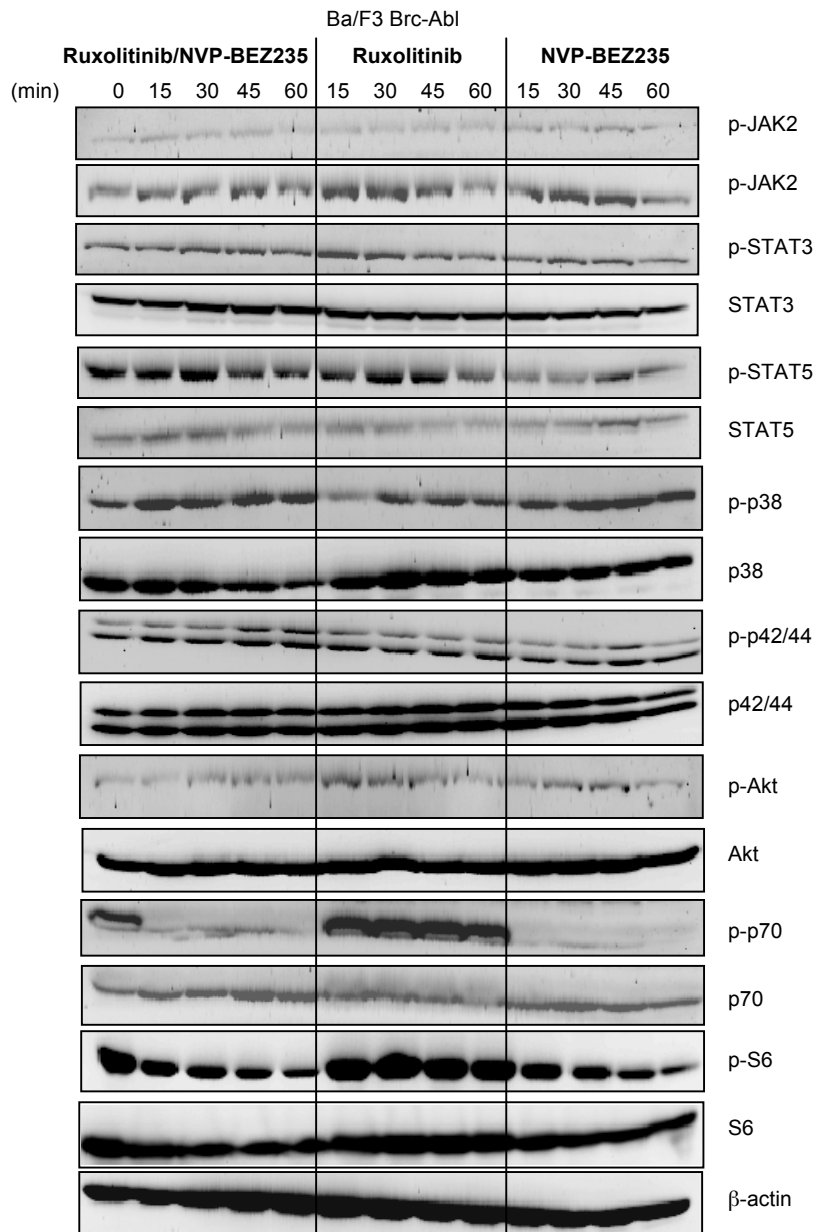

**Supplemental Figure 5.** Effects of inoculating Ba/F3 TpoR JAK2 V617F cells into BALB/c mice. The cells ( $1 \times 10^7$ ) were intravenously inoculated into 8 – 10 weeks old female nude mice. Organ enlargements were observed after 8 days (A). Proliferation of Ba/F3 TpoR JAK2 V617F cells in different organ compartments of the inoculated mice. By day 14, 40% of PBMC and 20% of spleen cells were Ba/F3 cells (B). Blood profiles of inoculated mice showing increase in WBC, and decrease in both RBC and platelets (C).

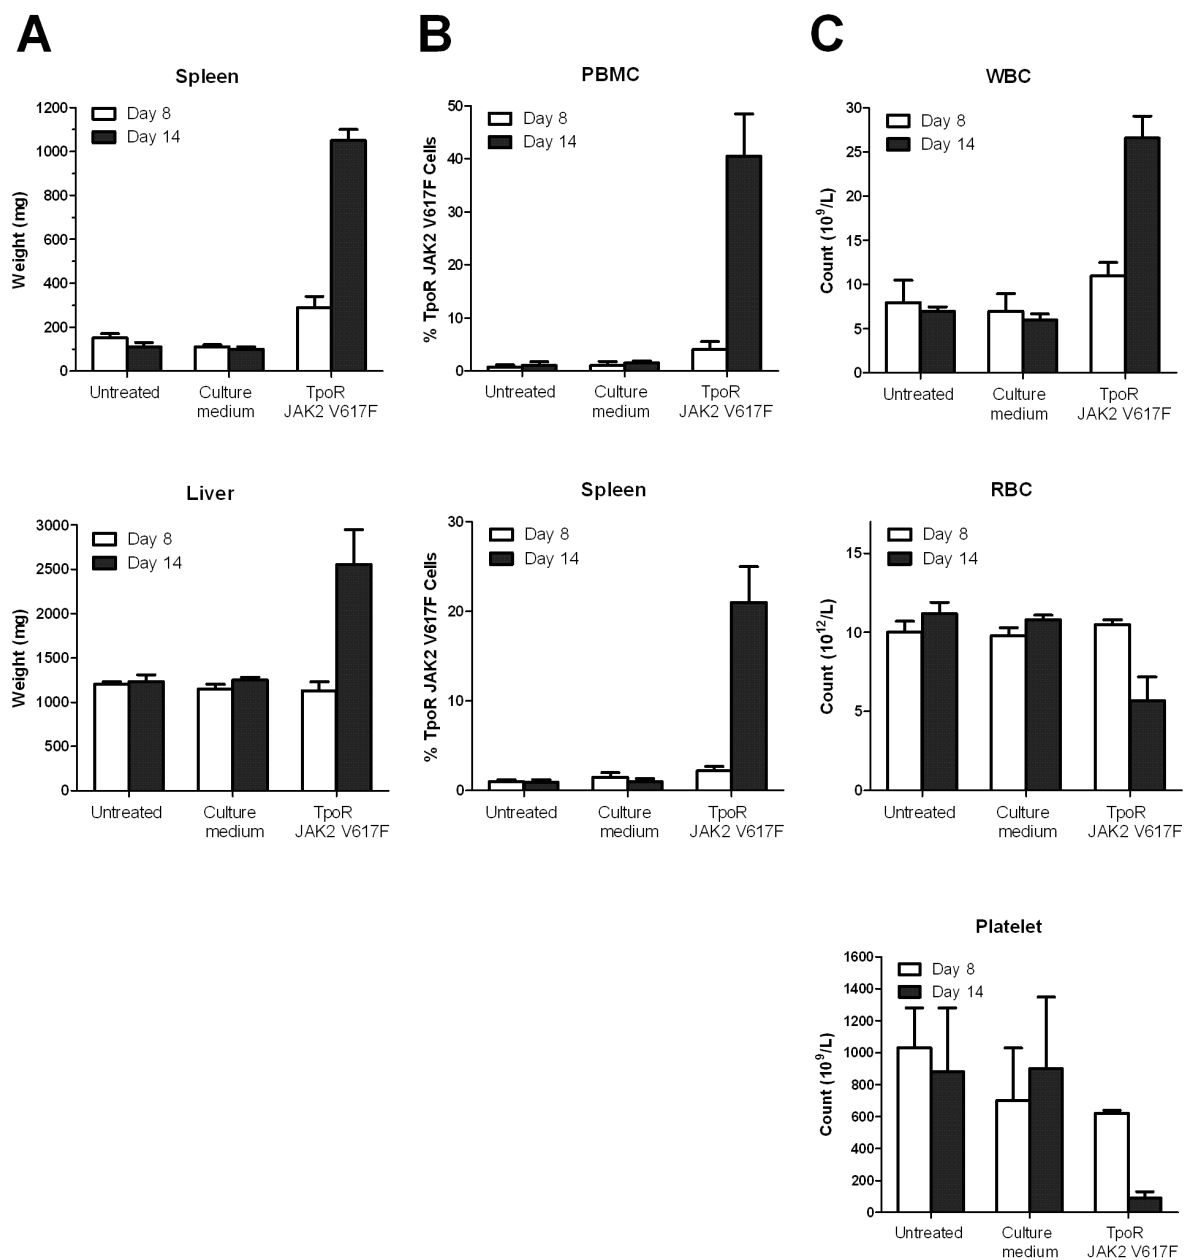

**Supplemental Figure 6.** Effects of the combination of JAK and PI3K inhibitors on Epo-independent CFU-Es (EECs) and Epo-independent BFU-Es from PV patients.

A. Day 7 EECs derived from a PV patient with 57% JAK2 V617F allele burden. Shown are averages of duplicates.

B. BFU-E colonies were detected at day 16 in presence of drugs alone (0.1  $\mu$ M ruxolitinib or 1  $\mu$ M GDC0941) and in combination or with vehicle as control in BFU-E assays where 500,000 peripheral PBMCs of a JAK2 V617F-positive PV patient (allele burden 49%) were plated per well. Shown results are average of triplicates  $\pm$  SD. Epo was used as positive control at 10 U/ml.

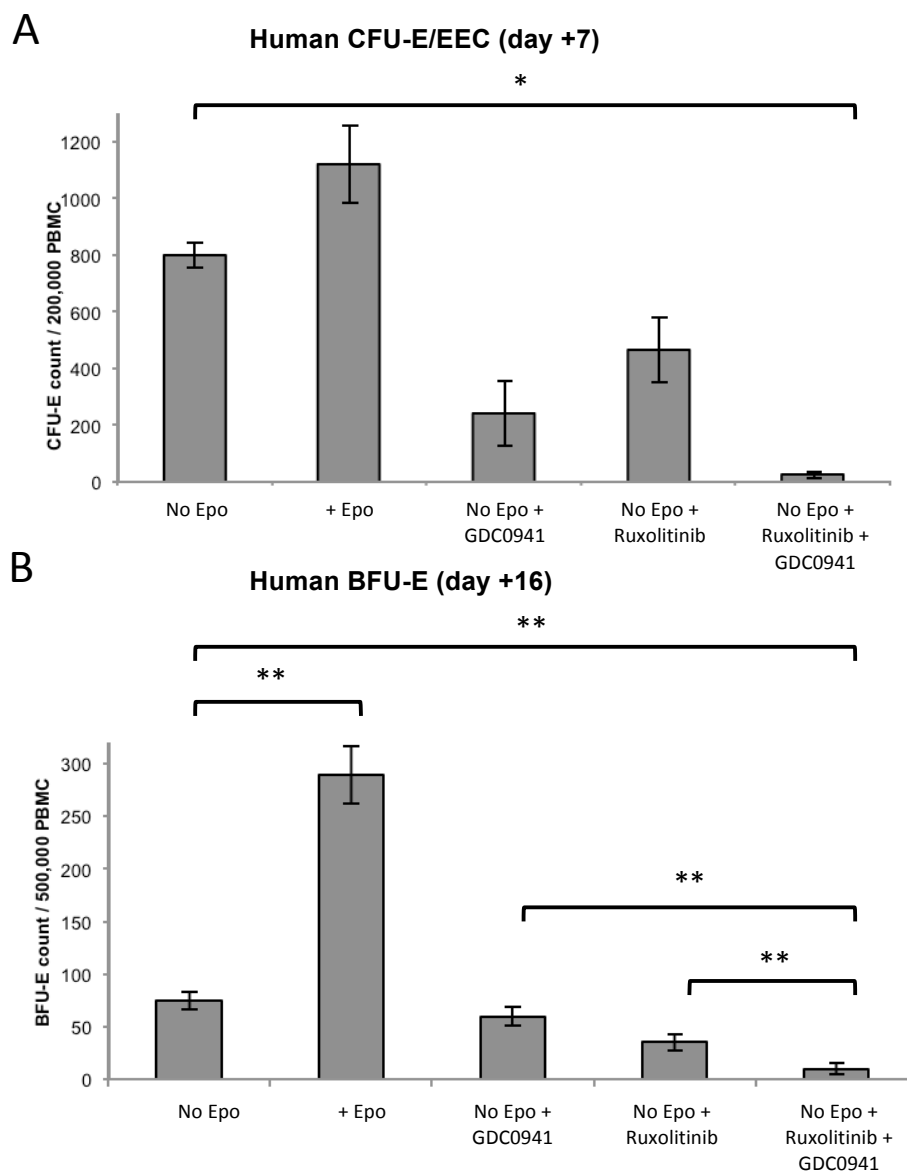

**Supplemental Table 1.** Pharmacokinetic profile of ruxolitinib and GDC0941 when administered in combination to nude mice injected with Ba/F3 TpoR JAK2 V617F cells. Plasma (n = 3) were harvested for 8 time points within 24 hours of treatment.

| Pharmacokinetics<br>- oral parameters  | Unit    | Ruxolitinib from |                                     |         | GDC0941 from combined<br>Ruxolitinib and GDC0941 |
|----------------------------------------|---------|------------------|-------------------------------------|---------|--------------------------------------------------|
|                                        |         | Ruxolitinib      | combined Ruxolitinib and<br>GDC0941 | GDC0941 |                                                  |
| C <sub>max</sub>                       | ng/ml   | 15879            | 15270                               | 9779    | 10350                                            |
| T <sub>max</sub>                       | hour    | 0.17             | 0.17                                | 0.17    | 0.5                                              |
| T <sub>1/2</sub>                       | hour    | 0.83             | 1.48                                | 1.58    | 1.82                                             |
| AUC <sub>0-inf</sub>                   | ng.h/ml | 9135             | 9855                                | 37912   | 42716                                            |
| C <sub>max</sub> /IC <sub>50</sub>     | -       | 104              | 100                                 | 1.2     | 1.3                                              |
| AUC <sub>0-inf</sub> /IC <sub>50</sub> | -       | 60               | 64                                  | 4.8     | 5.4                                              |

Note: IC<sub>50</sub> values were 153 ng/ml for ruxolitinib and 7858 ng/ml for GDC0941 in *in vitro* cytotoxicity assay using Ba/F3 TpoR JAK2 V617F cells.
